# Supplementary material
Source: HighWire-hosted journal article supplement (https://bmjopen.bmj.com/content/12/4/e059144)
Supplement: inline-supplementary-material-1 [file inline-supplementary-material-1.pdf]

Appendix I: Search Strategies:

MEDLINE (Ovid)

Search conducted November 9, 2021

| Search | Query                                                                                                                                                                  | Records Retrieved |
|--------|------------------------------------------------------------------------------------------------------------------------------------------------------------------------|-------------------|
| #1     | exp urinary bladder neoplasm/                                                                                                                                          | 57,601            |
| #2     | ((bladder or urothelial or transitional cell or urinary bladder or vesical) adj10 (cancer* or carcinoma* or neoplasm* or tumor* or tumour*)),af                        | 91,090            |
| #3     | 1 or 2                                                                                                                                                                 | 91,090            |
| #4     | (Indigenous or Aborigin* or "Torres Strait" or First Nation* or First people*).af                                                                                      | 72,300            |
| #5     | exp oceanic ancestry group/                                                                                                                                            | 11,305            |
| #6     | 4 or 5                                                                                                                                                                 | 76,219            |
| #7     | (Australia* or New South Wales or Victoria or South Australia or Western Australia or Queensland or Tasmania or Northern Territory or Australian Capital Territory).mp | 223,956           |
| #8     | exp Australia/                                                                                                                                                         | 157,789           |
| #9     | 7 or 8                                                                                                                                                                 | 223,956           |
| #10    | 3 and 9                                                                                                                                                                | 213               |
| #11    | 6 and 10                                                                                                                                                               | 2                 |
| #12    | 3 and 6                                                                                                                                                                | 227               |
| #13    | 11 or 12                                                                                                                                                               | 227               |

EMBASE (Elsevier)

Proposed Strategy.

| Search | Query                                                                                                                                            |
|--------|--------------------------------------------------------------------------------------------------------------------------------------------------|
| #1     | 'bladder tumor'/exp OR 'bladder tumor'                                                                                                           |
| #2     | (bladder OR urothelial OR 'transitional cell' OR 'urinary bladder' OR vesical) NEAR/10 (cancer* OR carcinoma* OR neoplasm* OR tumor* OR tumour*) |
| #3     | #1 OR #2                                                                                                                                         |
| #4     | 'oceanic ancestry group'                                                                                                                         |
| #5     | 'australian aborigine'                                                                                                                           |
| #6     | indigenous OR aborigin* OR 'torres strait' OR 'first nation*' OR 'first people*'                                                                 |
| #7     | #4 OR #5 OR #6                                                                                                                                   |
| #8     | #3 AND #7                                                                                                                                        |

Web of Science (Clarivate)

Proposed Strategy.

| Search | Query                                                                                                          |
|--------|----------------------------------------------------------------------------------------------------------------|
| #1     | ALL=(urinary bladder neoplasm)                                                                                 |
| #2     | ((((ALL=(bladder)) OR ALL=(urothelial)) OR ALL=(transitional cell)) OR ALL=(urinary bladder)) OR ALL=(vesical) |
| #3     | ((((ALL=(cancer)) OR ALL=(carcinoma)) OR ALL=(neoplasm)) OR ALL=(tumo\$fr)                                     |

|    |                                                                                                                                                         |
|----|---------------------------------------------------------------------------------------------------------------------------------------------------------|
| #4 | #2 AND #3                                                                                                                                               |
| #5 | (((((ALL=(oceanic ancestry group))) OR ALL=(indigenous)) OR ALL=(aborigin*)) OR ALL=("Torres Strait")) OR ALL=("First Nation")) OR ALL=("first people") |
| #6 | #4 AND #5                                                                                                                                               |

## CINAHL (EBSCO)

## Proposed Strategy.

|     |                                                                                 |
|-----|---------------------------------------------------------------------------------|
| #1  | (MH "urinary bladder neoplasm"+)                                                |
| #2  | (MH "Bladder Neoplasms")                                                        |
| #3  | bladder OR urothelial OR transitional cell OR urinary bladder OR vesical        |
| #4  | cancer OR carcinoma* OR neoplasm* OR tumour* OR tumor*                          |
| #5  | (MH "Aboriginal Australians") OR (MH "First Nations of Australia")              |
| #6  | (MH "Torres Strait Islanders")                                                  |
| #7  | indigenous OR aborigin* OR "Torres Strait" OR "First Nations" OR "First People" |
| #8  | S1 OR S2                                                                        |
| #9  | S3 AND S4                                                                       |
| #10 | S8 OR S9                                                                        |
| #11 | S5 OR S6 OR S7                                                                  |
| #12 | (S5 OR S6 OR S7) AND (S10 AND S11)                                              |
